# Supplementary material for: Effect of fatigue and gender on kinematics and ground reaction forces variables in recreational runners
Source: PeerJ. 2018 Mar 20;6:e4489. doi: 10.7717/peerj.4489 (PMC5865467; doi:10.7717/peerj.4489)
Supplement: Supplemental Information 1 [file peerj-06-4489-s001.xlsx]

## Sheet: Sheet1
SUBJECT	GENDER	REPETITION	take_on_C1	take_on_C2	take_off_C1	take_off_C2	FULLCONTACT_C1	FULLCONTACT_C2
1	1	1	13.307	18.2895	-17.6379	-12.9642	17.3255	18.7264
1	1	2	14.0025	17.0074	-16.6586	-16.3383	18.4312	17.0074
1	1	3	15.6423	20.1675	-17.7601	-14.8782	19.219	20.1675
1	1	4	17.3399	20.1557	-13.586	-13.6384	17.8863	20.1557
1	1	5	16.5077	20.1436	-16.7963	-13.917	20.1512	20.1436
2	2	1	13.365	#NULL!	-21.2403	#NULL!	13.4153	#NULL!
2	2	2	12.3399	#NULL!	-23.2729	#NULL!	12.3399	#NULL!
2	2	3	11.2182	#NULL!	-21.9178	#NULL!	13.1233	#NULL!
2	2	4	11.6938	#NULL!	-26.2031	#NULL!	14.1537	#NULL!
2	2	5	11.4476	#NULL!	-25.6277	#NULL!	16.3694	#NULL!
3	1	1	15.6029	#NULL!	-5.43051	#NULL!	23.7271	#NULL!
3	1	4	13.9538	#NULL!	#NULL!	#NULL!	27.9007	#NULL!
5	2	1	10.4634	15.5215	-15.1036	#NULL!	22.7342	29.2201
5	2	2	13.3835	15.0563	-13.1167	-12.5556	22.0978	23.7938
5	2	3	12.1589	16.1605	#NULL!	-11.6285	21.5273	19.8689
5	2	4	12.361	15.0371	-13.7105	-10.0932	22.1599	21.2372
5	2	5	#NULL!	15.9466	#NULL!	#NULL!	#NULL!	23.8759
6	1	1	#NULL!	9.64459	#NULL!	-19.1053	#NULL!	21.7195
6	1	2	14.8691	#NULL!	-23.5934	#NULL!	23.3999	#NULL!
6	1	3	13.5139	11.2421	-20.4806	-24.1135	21.6259	22.4041
6	1	4	10.7642	7.10481	-22.9386	-22.537	24.1667	21.4046
6	1	5	10.4389	9.92349	-22.0333	-24.552	24.3136	21.8007
7	1	1	-2.30442	-1.30139	-23.5113	-18.2913	13.1981	18.0542
7	1	2	#NULL!	#NULL!	#NULL!	#NULL!	13.807	#NULL!
7	1	3	-0.504125	1.9825	-21.6139	#NULL!	15.3944	17.5871
7	1	4	#NULL!	1.8798	#NULL!	-19.5879	#NULL!	17.6756
7	1	5	#NULL!	0.521139	#NULL!	-19.8827	#NULL!	19.3609
8	1	1	10.3845	#NULL!	-13.7385	#NULL!	18.2729	#NULL!
8	1	2	14.3536	14.4181	-10.2904	-13.4263	21.7946	18.3909
8	1	4	14.2999	15.1644	-15.2704	-13.7779	19.5458	18.1567
8	1	5	13.5182	14.5038	-14.0719	-13.5435	18.6155	18.1311
9	2	1	8.76856	#NULL!	-19.48	#NULL!	26.13	#NULL!
9	2	4	10.156	#NULL!	-22.6526	#NULL!	26.6006	#NULL!
9	2	5	#NULL!	13.5287	-21.1955	-17.6914	26.3037	30.706
10	2	1	11.7322	10.6219	-13.7147	-9.76953	20.3553	23.0878
10	2	2	9.21893	11.6546	-13.0532	-12.4991	20.7608	24.5659
10	2	3	11.1891	11.6076	-11.1872	-13.4405	21.664	24.4644
10	2	4	11.5747	12.6803	-15.1354	-11.9377	19.868	30.3689
10	2	5	10.8222	11.717	-13.621	-12.0255	22.5096	24.3858
11	2	1	14.1188	12.2206	-13.5552	-14.8738	20.4854	23.8161
11	2	2	14.4656	#NULL!	-16.4844	#NULL!	21.4636	#NULL!
11	2	3	#NULL!	#NULL!	-18.6314	#NULL!	19.9033	#NULL!
11	2	4	13.0328	#NULL!	-17.2363	#NULL!	19.3348	#NULL!
11	2	5	13.6099	12.2696	-19.7861	-11.917	18.4328	24.5628
12	2	1	17.8782	16.3998	-16.5641	-16.5529	21.7525	21.758
12	2	2	21.4101	16.1834	-15.1954	-14.0017	21.4101	22.2891
12	2	3	18.1041	16.5065	-15.9517	-19.3083	20.0236	20.7349
12	2	4	19.6371	14.6905	-16.0835	-14.4573	22.9103	21.7299
12	2	5	19.9761	15.9574	-16.3614	-12.9551	21.2484	20.4567
13	1	1	6.23934	13.0334	-17.8374	-12.3484	21.4697	24.1793
13	1	2	8.89753	12.7199	-16.4543	-10.8015	17.7169	22.0719
13	1	3	5.66352	12.5546	-17.6497	-15.3966	17.9162	22.7268
13	1	4	#NULL!	12.3186	-14.9755	-10.1939	20.8068	23.0446
13	1	5	4.95126	12.1925	-19.4177	-10.488	18.1778	21.8437
14	1	1	#NULL!	5.83968	#NULL!	-18.8456	#NULL!	15.5033
14	1	2	#NULL!	4.92337	#NULL!	-18.6835	#NULL!	15.0929
14	1	3	#NULL!	4.44503	#NULL!	-19.4402	#NULL!	16.4065
14	1	4	#NULL!	6.36463	#NULL!	-18.6285	#NULL!	15.8486
14	1	5	#NULL!	5.67438	#NULL!	-17.6357	#NULL!	15.424
15	1	2	#NULL!	14.4467	#NULL!	-10.6356	#NULL!	20.4691
16	2	1	#NULL!	#NULL!	-14.5098	#NULL!	22.7651	#NULL!
16	2	4	8.88467	#NULL!	#NULL!	#NULL!	20.3411	#NULL!
17	1	1	8.96791	5.57679	-22.2531	-21.9413	15.8921	12.2112
17	1	2	7.71386	7.63972	-21.5153	-24.416	16.3031	15.2803
17	1	3	10.1494	8.10663	-21.2439	-23.251	16.9997	15.2584
17	1	4	10.611	9.4134	-21.9879	-24.9812	16.7329	14.8921
17	1	5	9.64563	8.37253	-20.6574	-22.0194	17.2545	14.7271
18	1	1	#NULL!	#NULL!	-22.4311	-22.2433	12.1126	15.1534
18	1	2	#NULL!	#NULL!	-24.1019	-24.8531	12.5129	16.1689
18	1	3	#NULL!	#NULL!	-23.9134	-24.7005	11.9794	13.3428
18	1	4	#NULL!	#NULL!	-27.8887	-27.4807	12.0567	13.9096
18	1	5	#NULL!	#NULL!	-29.3948	-27.5458	10.8185	15.1177
19	2	1	#NULL!	20.423	#NULL!	-6.49937	#NULL!	28.4134
19	2	2	23.4128	23.4924	-8.0762	-1.68814	26.1502	27.9002
19	2	3	24.2088	22.1719	-9.7976	-4.2254	26.6794	27.2371
19	2	4	23.8145	21.6631	-9.79423	-4.89798	27.222	26.4631
19	2	5	23.4029	22.8417	-10.273	-1.71595	26.0964	31.4818
20	2	1	24.6125	24.4984	-13.9727	-11.7914	27.7602	25.5115
20	2	2	23.6792	24.8591	-16.2459	-11.5913	25.6798	26.9019
20	2	3	24.1136	23.6976	-10.4402	-6.35847	26.1497	23.9355
20	2	4	#NULL!	21.1619	-13.5083	-12.8353	27.8573	22.6208
20	2	5	24.2278	24.1522	-10.9327	-13.0836	27.2016	24.1522
21	1	1	9.33901	14.2353	-20.379	-13.1866	22.5829	25.7219
21	1	2	9.28266	13.4782	-19.233	-16.2834	23.5644	24.7739
21	1	3	10.6154	9.57852	-23.6657	-16.1187	25.8521	24.267
21	1	4	8.79005	14.0461	-25.5053	-14.9223	22.5477	23.8278
21	1	5	8.76507	12.6283	-20.2237	-16.1986	23.7865	26.9093
22	2	1	5.4955	-2.83672	-9.63156	-16.3201	22.0342	17.6185
22	2	2	4.26993	-1.44778	-12.1561	-14.0003	22.9076	17.51
22	2	3	5.54201	-0.490469	-13.4994	-13.2446	19.9748	19.2234
22	2	4	7.73673	1.83725	-11.7165	-14.7636	21.5893	18.1146
22	2	5	7.01939	2.2405	-10.7406	-14.2529	23.1144	17.9548
23	2	1	17.5599	14.3716	-11.4351	-8.82686	20.3631	20.1702
23	2	2	17.2781	14.9871	#NULL!	-13.6658	23.5103	19.495
23	2	3	16.862	16.0822	-10.9887	#NULL!	21.6622	21.0196
23	2	4	17.53	16.3563	-13.39	-15.3695	22.4699	19.481
23	2	5	18.1736	14.8575	-10.6375	-10.7421	24.0347	22.3335
24	1	1	15.4093	7.84781	-17.6623	-24.9186	17.0319	15.194
24	1	2	14.1251	11.2077	-24.0459	-23.4759	15.8708	16.4893
24	1	3	16.0377	14.8965	-20.0631	-23.0121	16.3376	16.7427
24	1	4	12.7111	8.71438	-14.3167	-27.933	15.0572	15.5751
24	1	5	12.7108	15.8946	-23.4505	-24.1135	15.2079	19.4408
25	1	1	2.93442	8.41669	-18.0415	-14.5343	22.6454	21.0319
25	1	2	9.78712	8.30098	-17.2071	-10.2314	21.8817	17.8175
25	1	3	12.5676	8.11505	-12.4538	-12.1532	22.8362	18.7351
25	1	4	9.90166	9.97238	-17.6272	-13.6181	24.4871	20.117
25	1	5	5.391	8.41069	-18.8246	-10.9806	23.1482	18.6454
26	1	1	14.3172	13.8744	-21.7768	-16.4798	22.6042	23.3299
26	1	2	12.8502	14.5821	-20.3078	-21.1939	23.5903	26.1705
26	1	3	13.5177	8.7588	-23.305	-18.9002	23.2679	25.4671
26	1	4	13.8378	10.3914	-22.7123	-15.9945	23.1124	25.014
26	1	5	14.6912	9.07126	-25.3576	-17.2715	22.8138	25.2953
27	1	1	8.77675	12.3365	-17.5839	-21.9737	17.546	19.5319
27	1	2	13.4587	11.9397	-19.1043	-23.2494	18.8209	17.7074
27	1	3	12.3543	11.5968	-19.8861	-19.6834	16.652	19.7755
27	1	4	12.8685	11.1333	-21.0858	-23.6299	19.0468	17.2499
27	1	5	12.7397	11.8273	-19.5826	-21.9446	19.0983	19.7649
28	2	1	17.2257	15.6664	-11.1483	-10.4893	21.821	27.3643
28	2	2	16.5683	17.3491	-14.5122	-10.5885	22.026	27.0584
28	2	3	15.5832	15.3499	-13.6122	-10.3254	22.6078	24.9122
28	2	4	17.048	16.2621	-13.782	-9.96843	23.2566	23.7054
28	2	5	16.3538	14.8287	-12.4896	-10.8653	22.2914	25.1375
29	1	1	8.59781	#NULL!	-18.5876	-19.4881	22.3955	25.7988
29	1	2	10.4486	10.8775	-20.3571	-18.826	21.4288	23.4813
29	1	3	10.1823	10.4728	-19.9316	-21.1308	22.3814	25.1452
29	1	4	9.51949	10.2594	-21.6432	-18.0497	22.1784	24.7322
29	1	5	10.4264	10.6443	-20.8008	-20.8889	22.6056	30.164
30	1	1	#NULL!	6.84535	#NULL!	-15.4761	#NULL!	17.9482
30	1	2	#NULL!	8.1682	#NULL!	-10.9336	#NULL!	18.6158
30	1	3	#NULL!	7.13422	#NULL!	-14.6597	#NULL!	19.3597
30	1	4	#NULL!	8.24691	#NULL!	-9.92005	#NULL!	18.48
31	1	1	15.0255	#NULL!	-17.7676	#NULL!	18.8775	#NULL!
31	1	2	16.9067	#NULL!	-14.6522	#NULL!	20.6709	#NULL!
31	1	4	15.5935	#NULL!	-16.0952	#NULL!	19.8145	#NULL!
31	1	5	16.3493	#NULL!	-14.5494	#NULL!	22.119	#NULL!
32	1	1	#NULL!	8.71824	#NULL!	-8.18803	#NULL!	21.0199
32	1	2	#NULL!	12.8319	#NULL!	-9.50225	#NULL!	20.7283
32	1	3	16.6046	12.8877	-9.63885	-10.5403	21.9056	19.9144
32	1	4	15.6348	13.1856	-12.6072	-9.94741	21.5051	21.6068
32	1	5	15.6774	11.1008	-11.2057	-11.0974	20.336	20.8095
33	1	1	#NULL!	#NULL!	-20.9485	-22.5589	19.6724	20.9169
33	1	2	#NULL!	#NULL!	-21.1766	-23.5354	18.9132	18.2301
33	1	3	#NULL!	#NULL!	-20.5823	-27.9291	18.3583	18.808
33	1	4	#NULL!	#NULL!	-22.0139	-23.6593	19.3388	20.2824
33	1	5	#NULL!	#NULL!	-22.423	-25.0299	22.6146	19.1204
34	2	1	13.049	15.7803	-15.4176	-10.4848	20.1427	23.0978
34	2	2	12.1193	14.6242	-16.2644	-13.6584	19.9365	22.8005
34	2	3	13.3805	11.3705	-11.5924	-9.97483	20.714	23.9905
34	2	4	13.5543	12.7331	-15.365	-17.4962	18.8809	22.6752
34	2	5	13.8561	13.101	-17.097	-13.4351	20.9118	20.4792
35	1	1	15.7576	#NULL!	-17.9859	-15.1023	22.4716	22.7644
35	1	2	14.822	12.1884	-16.1996	-19.256	24.007	23.2349
35	1	3	12.9994	14.0615	-17.7734	-15.2526	22.3975	23.5079
35	1	4	14.0816	14.3553	-17.4317	-16.0631	24.3274	25.4243
35	1	5	11.3386	13.1927	-19.518	-19.1643	22.15	23.8567
36	2	2	17.5917	22.1326	#NULL!	-3.10935	27.5114	27.4564
36	2	3	#NULL!	22.2364	#NULL!	#NULL!	#NULL!	27.3206
36	2	4	19.5806	23.4908	-3.83842	-4.78015	26.0419	26.3269
36	2	5	#NULL!	23.4547	#NULL!	#NULL!	#NULL!	26.763
37	2	1	#NULL!	6.6201	#NULL!	-13.5254	#NULL!	13.36
37	2	2	#NULL!	5.9333	#NULL!	-17.1019	#NULL!	10.5308
37	2	3	#NULL!	4.90422	#NULL!	-13.3568	#NULL!	#NULL!
37	2	4	#NULL!	6.92075	#NULL!	-15.0237	#NULL!	13.0675
37	2	5	#NULL!	4.00977	#NULL!	-15.5334	#NULL!	11.1416
38	1	1	#NULL!	11.1961	#NULL!	-17.3012	#NULL!	19.1668
38	1	2	#NULL!	13.3079	#NULL!	-19.0496	#NULL!	21.1268
38	1	3	#NULL!	11.981	#NULL!	-19.2955	#NULL!	18.5375
38	1	4	#NULL!	13.2442	#NULL!	-20.8084	#NULL!	17.7583
38	1	5	9.18927	10.6427	-18.7223	-22.2711	20.2281	16.4111
39	1	1	12.4272	#NULL!	-21.5113	#NULL!	19.5382	#NULL!
39	1	2	11.6102	14.2498	-22.6056	-17.5923	19.4246	20.8465
39	1	3	13.2179	10.3601	-22.118	-16.4733	21.2633	20.9684
39	1	4	13.7617	9.09602	-20.687	-18.9167	20.608	21.469
39	1	5	11.685	10.3348	-22.5432	-17.7009	21.2707	21.831
40	1	1	#NULL!	#NULL!	-23.3254	-23.8217	18.1717	14.9056
40	1	2	#NULL!	#NULL!	-25.4071	-20.9511	19.655	16.0447
40	1	3	#NULL!	#NULL!	-23.5423	-26.2278	19.0178	15.244
40	1	4	#NULL!	#NULL!	-26.5293	-20.6981	18.638	14.299
40	1	5	#NULL!	#NULL!	-24.9424	-23.1161	17.9186	12.2339
41	2	1	8.92623	4.0932	-14.7473	-15.6474	19.5072	18.4155
41	2	2	7.87079	5.95403	-14.0522	-12.6542	21.2213	21.5229
41	2	3	9.84644	7.83408	-14.8312	-10.9657	22.0977	15.4912
41	2	4	8.85344	8.62149	-11.0023	-15.1187	20.8525	13.2262
41	2	5	10.5734	6.48196	-13.1674	-19.2557	19.6212	16.8452
42	1	1	9.2556	#NULL!	-11.7978	#NULL!	24.1578	#NULL!
42	1	2	7.23187	9.38575	-11.2142	-16.6899	21.6767	23.4511
42	1	3	6.6608	10.4973	-15.6416	-16.8221	20.7143	22.3432
42	1	4	7.18924	12.4978	-11.6904	-15.8789	25.7409	23.1835
42	1	5	8.68684	12.4369	-14.5216	-15.7223	23.948	25.3246
43	2	1	15.7993	11.9619	-14.7714	-15.8949	24.7677	23.6797
43	2	2	15.2511	14.1924	-16.8068	-13.2999	22.239	25.446
43	2	3	15.2757	13.1532	-15.0422	-13.3813	21.3739	19.7054
43	2	4	16.0738	15.6171	-13.7348	-16.0289	22.9119	21.7581
43	2	5	14.5763	14.3103	-13.7063	-15.0096	24.4257	21.5856
44	2	1	14.4925	10.3321	-13.2656	-17.0733	25.9642	18.1137
44	2	2	14.2736	11.1141	-14.7417	-17.52	26.5187	19.645
44	2	3	13.8886	8.98748	-12.6451	-19.2342	25.5272	16.2092
44	2	4	16.3225	5.80876	-14.5114	-20.6385	24.8742	16.6384
44	2	5	14.1006	11.3131	-12.6892	-18.7553	23.3434	17.6685
45	2	1	6.00121	-3.2503	-16.7273	#NULL!	22.7569	21.8227
45	2	2	8.77659	5.1154	-13.8739	-16.5758	21.2003	20.0943
45	2	3	7.51731	7.79089	-15.8581	-15.1742	21.434	23.6853
45	2	4	6.33696	6.25824	-20.7743	-14.7382	21.3179	22.7883
45	2	5	6.94941	7.61048	-20.3489	-15.4659	21.4571	23.0969
46	1	1	-1.86058	1.65596	-21.3537	-16.5127	19.4235	18.6638
46	1	2	1.09462	4.77949	-21.8534	-19.9061	18.3	18.4023
46	1	3	0.905749	3.76136	-19.4055	-15.1866	17.2266	19.7648
46	1	4	1.66983	5.20115	-20.4293	-15.2517	17.5005	18.7569
46	1	5	2.0429	2.24391	-22.133	-16.119	18.6159	16.9179
47	2	1	17.6418	#NULL!	-16.5039	#NULL!	#NULL!	#NULL!
47	2	2	18.3805	16.5426	-18.1386	-19.9858	28.7808	22.8758
47	2	3	18.5777	14.8667	-13.8262	-15.4458	29.472	23.633
47	2	4	18.3792	#NULL!	-14.3728	#NULL!	28.9244	#NULL!
47	2	5	21.4158	14.7697	-15.3272	-19.2461	28.6875	25.6478
48	1	1	1.28258	5.15719	-9.32056	-4.64055	19.044	23.5924
48	1	2	2.17414	3.18604	-13.7687	-6.22405	17.9795	23.7734
48	1	3	2.84647	6.41257	-14.6547	-9.92394	20.2738	24.2087
48	1	4	1.83651	7.09486	-12.7424	-9.30054	21.9102	25.7423
48	1	5	1.4627	6.82359	-14.0506	-11.5543	18.9364	25.0754
49	2	1	14.4662	18.0874	-13.6955	-8.1548	23.3425	27.4338
49	2	2	#NULL!	19.7734	#NULL!	-11.4327	#NULL!	28.456
49	2	3	#NULL!	18.3634	#NULL!	-9.18917	#NULL!	#NULL!
49	2	4	12.4465	14.2548	-13.7671	-20.642	25.7116	29.1555
49	2	5	11.6618	16.864	-14.7719	-8.84203	25.9298	29.1695
50	2	1	5.87845	#NULL!	-6.94098	#NULL!	27.1684	#NULL!
50	2	2	8.31915	7.67123	-9.94782	-10.2444	31.2063	30.1173
50	2	3	6.92763	4.65249	-9.82062	-17.4895	28.538	29.3641
50	2	4	7.65104	#NULL!	-9.72921	#NULL!	30.4203	#NULL!
50	2	5	6.75261	7.33575	-9.65659	-13.6446	30.4276	30.706
51	2	1	13.038	#NULL!	-14.8584	#NULL!	25.4387	#NULL!
51	2	2	12.72	13.6882	-12.734	-12.0215	23.671	28.3364
51	2	3	15.1896	14.1481	-10.2889	-11.1094	24.3331	25.9824
51	2	4	14.4625	12.8618	-12.1264	-12.4691	25.783	28.3977
51	2	5	#NULL!	12.9363	#NULL!	-12.8128	#NULL!	26.4055
52	2	1	17.7867	8.82577	-19.3126	-19.7985	23.721	14.4973
52	2	3	17.0614	#NULL!	-21.0847	#NULL!	21.9122	#NULL!
52	2	4	17.7308	#NULL!	-20.362	#NULL!	25.6222	#NULL!
52	2	5	18.3942	6.19234	-16.3031	-23.1236	21.5017	17.4763
53	1	1	21.0348	7.93111	-14.9979	-15.6593	21.0348	15.5014
53	1	2	11.4428	7.23891	-17.1711	-23.1641	18.7738	15.9292
53	1	3	7.88455	1.08306	-16.8604	-28.5616	17.5398	18.2573
53	1	4	11.6005	7.26291	-15.6602	-20.4627	18.4501	17.5358
53	1	5	#NULL!	11.2054	#NULL!	-17.3425	#NULL!	17.6315
54	2	1	#NULL!	7.94865	#NULL!	-15.8382	#NULL!	23.0287
54	2	2	10.9202	#NULL!	-23.1952	#NULL!	22.217	#NULL!
54	2	3	6.73725	#NULL!	-19.4011	#NULL!	19.8878	#NULL!
54	2	4	15.2894	9.20915	-15.5221	-17.4842	19.7064	20.6971
54	2	5	10.3749	12.6787	-20.1468	-15.928	19.2616	20.4541
55	2	1	#NULL!	#NULL!	#NULL!	-20.265	17.338	14.4704
55	2	2	9.33239	3.63723	#NULL!	-20.0524	28.4115	15.0634
55	2	3	12.7288	10.3002	-14.4242	-21.3397	27.3116	11.9175
55	2	4	11.4319	#NULL!	-21.7217	#NULL!	15.7607	#NULL!
55	2	5	10.1208	11.2444	-23.2843	-23.0527	13.8576	15.3699
56	1	1	9.08449	#NULL!	#NULL!	#NULL!	25.1652	#NULL!
56	1	2	12.6287	#NULL!	-18.1899	#NULL!	26.3774	#NULL!
57	2	1	15.6935	#NULL!	-13.7584	#NULL!	21.7554	#NULL!
57	2	2	18.0661	#NULL!	-12.67	#NULL!	22.2827	27.4736
57	2	3	18.8196	25.1656	-10.4108	-9.71063	25.3023	27.4731
57	2	4	13.2484	#NULL!	-14.6558	-3.4395	24.5439	29.6722
57	2	5	17.6226	#NULL!	-12.3559	#NULL!	22.2496	#NULL!
58	2	1	9.74806	13.8195	-21.5052	-20.4423	16.768	17.7728
58	2	2	13.793	3.90238	-19.6844	-21.055	16.8713	16.6304
58	2	3	15.4601	8.07299	-18.6744	#NULL!	18.7464	18.6556
58	2	4	#NULL!	7.64277	#NULL!	-21.9376	#NULL!	17.0571
58	2	5	#NULL!	5.64115	#NULL!	-18.5525	#NULL!	21.5279
59	2	4	#NULL!	9.18328	#NULL!	#NULL!	#NULL!	22.4971
59	2	5	#NULL!	15.8976	#NULL!	-15.466	#NULL!	19.8282
60	2	1	#NULL!	13.1046	#NULL!	-8.14204	#NULL!	23.7015
60	2	2	13.459	14.8521	-12.043	-8.59764	23.5839	23.5717
60	2	3	15.8871	13.9381	-9.8163	-9.89232	21.8117	25.8025
60	2	4	10.9393	#NULL!	-13.0432	#NULL!	19.1729	#NULL!
60	2	5	13.1655	#NULL!	-9.27791	#NULL!	21.0633	#NULL!
