# Supplementary material for: Effect of fatigue and gender on kinematics and ground reaction forces variables in recreational runners
Source: PeerJ. 2018 Mar 20;6:e4489. doi: 10.7717/peerj.4489 (PMC5865467; doi:10.7717/peerj.4489)
Supplement: Supplemental Information 3 [file peerj-06-4489-s003.xlsx]

## Sheet: Sheet1
Subject	Gender	Repetition	FIRST_PEAK_FORCE.C1	FIRST_PEAK_FORCE.C2	MAX_FORCE.C1	MAX_FORCE.C2	LOADING_RATE.C1	LOADING_RATE.C2	BRAKING.C1	BRAKING.C2	PROPULSIVE.C1	PROPULSIVE.C2
S01	1	1	2.294	2.215	2.615	2.609	88.55	83.47	0.468	0.421	-0.252	-0.283
S01	1	2	1.896	2.623	2.695	2.837	67.87	92.89	0.318	0.301	-0.328	-0.286
S01	1	3	1.835	2.425	2.697	2.608	64.6	97.37	0.426	0.496	-0.278	-0.267
S01	1	4	2.097	2.076	2.583	2.483	75.22	79.86	0.438	0.355	-0.278	-0.298
S01	1	5	1.713	2.369	2.56	2.768	62.72	88.04	0.344	0.368	-0.326	-0.262
S02	2	1	2.191	1.497	2.474	2.357	119.83	63.21	0.435	0.305	-0.337	-0.3
S02	2	2	1.91	1.459	2.557	2.401	90.53	71.3	0.447	0.344	-0.326	-0.327
S02	2	3	1.855	1.612	2.437	2.506	85.8	81.79	0.437	0.378	-0.349	-0.379
S02	2	4	1.832	1.577	2.581	2.479	82.03	70.51	0.34	0.31	-0.391	-0.35
S02	2	5	1.464	1.739	2.366	2.358	68.27	88.69	0.304	0.46	-0.351	-0.363
S03	1	1	1.904	1.675	2.219	2.329	69.94	61.57	0.313	0.342	-0.198	-0.267
S03	1	2	1.628	1.714	2.265	2.366	61.37	83.56	0.378	0.339	-0.284	-0.258
S03	1	3	2.024	2.011	2.154	2.268	78.91	91.4	0.313	0.334	-0.206	-0.229
S03	1	4	1.563	1.574	2.264	2.334	49.11	60.42	0.238	0.293	-0.3	-0.277
S03	1	5	1.798	1.785	2.26	2.243	96.58	77.72	0.334	0.384	-0.238	-0.243
S04	1	1	1.293	1.645	2.268	2.463	43.21	77.98	0.281	0.452	-0.252	-0.306
S04	1	2	1.698	1.604	2.304	2.459	68.93	76.27	0.306	0.397	-0.233	-0.275
S04	1	3	1.392	1.707	2.304	2.511	57.88	73.72	0.352	0.311	-0.303	-0.284
S04	1	4	1.668	1.642	2.226	2.349	66.7	74.84	0.362	0.326	-0.221	-0.292
S04	1	5	1.673	1.849	2.32	2.467	65.75	87.02	0.334	0.376	-0.228	-0.276
S05	2	1	1.999	1.798	2.459	2.342	112.32	91.9	0.338	0.368	-0.309	-0.283
S05	2	2	2.047	1.82	2.561	2.489	125.25	106.37	0.365	0.336	-0.331	-0.297
S05	2	3	1.935	1.958	2.537	2.453	105.64	101.65	0.35	0.379	-0.303	-0.261
S05	2	4	1.887	2.088	2.421	2.413	104.07	130.79	0.353	0.411	-0.292	-0.231
S05	2	5	2.082	1.902	2.386	2.324	120.2	115.75	0.338	0.36	-0.267	-0.251
S05	2	6	2.102	#NULL!	2.267	#NULL!	113.38	#NULL!	0.434	#NULL!	-0.237	#NULL!
S06	1	1	1.301	1.441	2.55	2.591	49.53	37.28	0.351	0.356	-0.289	-0.289
S06	1	2	1.56	1.156	2.406	2.59	59.03	44.05	0.335	0.329	-0.301	-0.302
S06	1	3	1.593	1.356	2.409	2.636	59.5	51.55	0.429	0.323	-0.25	-0.352
S06	1	4	1.675	1.53	2.38	2.52	59.86	50.03	0.413	0.337	-0.248	-0.269
S06	1	5	1.33	1.271	2.458	2.646	44.95	41.79	0.338	0.304	-0.281	-0.339
S06	1	6	#NULL!	1.581	#NULL!	2.634	#NULL!	50.25	#NULL!	0.358	#NULL!	-0.33
S07	1	1	#NULL!	1.979	2.458	2.426	127.23	72.67	0.306	0.367	-0.262	-0.211
S07	1	2	#NULL!	1.946	2.646	2.453	97.44	79.83	0.371	0.325	-0.32	-0.231
S07	1	3	1.721	2.174	2.462	2.303	69.26	84.59	0.259	0.437	-0.259	-0.218
S07	1	4	1.999	2.062	2.399	2.388	79.78	88.7	0.292	0.361	-0.201	-0.248
S07	1	5	2.005	1.888	2.48	2.542	79.26	76.04	0.299	0.328	-0.222	-0.28
S08	1	1	#NULL!	1.548	2.409	2.31	69.41	52.03	0.295	0.239	-0.174	-0.218
S08	1	2	1.505	1.592	2.373	2.305	58.75	58.93	0.292	0.29	-0.201	-0.153
S08	1	3	1.564	1.403	2.403	2.43	63.35	55.86	0.296	0.289	-0.175	-0.216
S08	1	4	1.547	1.587	2.38	2.411	60.15	63.21	0.331	0.275	-0.193	-0.199
S08	1	5	1.568	1.557	2.47	2.425	61.86	58.84	0.31	0.29	-0.222	-0.204
S09	2	1	1.481	1.325	2.524	2.437	62.6	52.64	0.464	0.297	-0.342	-0.349
S09	2	2	1.657	1.701	2.476	2.408	68.24	80.07	0.527	0.481	-0.349	-0.366
S09	2	3	1.628	1.532	2.538	2.59	76.9	57.48	0.4	0.465	-0.376	-0.365
S09	2	4	1.756	1.591	2.376	2.318	87.97	66.64	0.55	0.473	-0.311	-0.348
S09	2	5	1.654	1.575	2.486	2.524	69.66	79.7	0.554	0.502	-0.368	-0.378
S09	2	6	#NULL!	1.793	#NULL!	2.345	#NULL!	105.35	#NULL!	0.468	#NULL!	-0.368
S10	2	1	2.218	1.836	2.872	2.753	76.38	66.55	0.399	0.368	-0.31	-0.315
S10	2	2	2.141	1.915	2.806	2.818	71	68.72	0.383	0.361	-0.299	-0.282
S10	2	3	2.193	1.932	2.776	2.716	82.26	65.88	0.394	0.341	-0.261	-0.298
S10	2	4	2.25	1.869	2.836	2.782	77.52	64.48	0.41	0.377	-0.232	-0.307
S10	2	5	1.96	2.018	2.7	2.851	66.14	80.3	0.399	0.346	-0.269	-0.294
S10	2	6	#NULL!	2.103	#NULL!	2.824	#NULL!	68.46	#NULL!	0.368	#NULL!	-0.288
S11	2	1	2.058	1.94	2.533	2.66	70.17	71.32	0.327	0.383	-0.249	-0.351
S11	2	2	1.88	2.311	2.538	2.505	62.51	92.98	0.309	0.482	-0.32	-0.255
S11	2	3	2.215	2.221	2.406	2.426	88.11	83.38	0.487	0.443	-0.236	-0.186
S11	2	4	2.225	2.178	2.287	2.405	84.53	79.09	0.541	0.379	-0.188	-0.201
S11	2	5	2.398	2.064	2.398	2.356	82.94	76.42	0.429	0.427	-0.217	-0.26
S12	2	1	1.946	1.682	2.462	2.467	92.15	80.89	0.428	0.351	-0.305	-0.315
S12	2	2	1.956	1.995	2.477	2.46	98.66	83.91	0.568	0.368	-0.242	-0.297
S12	2	3	1.98	2.113	2.47	2.554	94.43	101.92	0.53	0.458	-0.252	-0.257
S12	2	4	1.883	1.77	2.919	2.359	82.66	84.26	0.546	0.458	-0.316	-0.311
S12	2	5	1.97	1.986	2.432	2.51	97.47	89.66	0.49	0.484	-0.258	-0.319
S13	1	1	2.453	2.004	2.988	3.018	87.76	76.92	0.417	0.413	-0.296	-0.307
S13	1	2	2.587	2.582	3.083	3.083	104.29	102.31	0.454	0.468	-0.278	-0.303
S13	1	3	2.465	2.418	3.105	3.035	99.72	113.53	0.476	0.409	-0.309	-0.275
S13	1	4	1.824	2.671	2.959	3.144	80.54	131.73	0.52	0.434	-0.309	-0.311
S13	1	5	2.422	2.776	3.017	3.171	92.25	107.95	0.474	0.396	-0.298	-0.274
S14	1	1	2.104	#NULL!	2.493	2.668	69.47	87.86	0.436	0.331	-0.272	-0.317
S14	1	2	1.863	#NULL!	2.662	2.574	63.2	93.36	0.423	0.268	-0.323	-0.331
S14	1	3	#NULL!	1.643	2.745	2.59	80.26	51.25	0.39	0.347	-0.313	-0.302
S14	1	4	1.981	1.559	2.562	2.587	72.48	67.36	0.437	0.331	-0.261	-0.297
S14	1	5	2.005	#NULL!	2.595	2.718	80.78	107.84	0.427	0.281	-0.282	-0.338
S14	1	6	#NULL!	#NULL!	2.752	#NULL!	89.14	#NULL!	0.395	#NULL!	-0.34	#NULL!
S15	1	1	2.302	1.996	3.114	3.038	76.09	75.55	0.379	0.399	-0.326	-0.388
S15	1	2	2.087	2.038	2.792	2.891	103.56	93.6	0.472	0.451	-0.304	-0.3
S15	1	3	2.232	1.883	2.995	2.714	100.54	91.94	0.376	0.487	-0.317	-0.23
S15	1	4	2.35	1.615	3.109	2.707	99.96	69.86	0.519	0.462	-0.265	-0.246
S15	1	5	1.825	2.136	2.758	2.782	74.52	89.15	0.423	0.492	-0.274	-0.233
S16	2	1	1.552	1.182	2.426	2.215	67.35	61.17	0.343	0.361	-0.259	-0.289
S16	2	2	1.587	1.777	2.283	2.382	60.39	78.61	0.345	0.445	-0.236	-0.305
S16	2	3	1.616	1.689	2.341	2.505	76.54	71.75	0.401	0.366	-0.24	-0.287
S16	2	4	1.828	1.741	2.219	2.441	92.9	89.66	0.405	0.414	-0.202	-0.229
S16	2	5	1.572	1.627	2.416	2.411	77.76	67.98	0.396	0.317	-0.252	-0.292
S17	1	1	2.387	2.144	2.589	2.547	88.89	69.07	0.303	0.384	-0.256	-0.223
S17	1	2	2.368	#NULL!	2.572	2.729	90.83	131.93	0.354	0.272	-0.253	-0.316
S17	1	3	2.251	2.046	2.641	2.573	90.04	81.19	0.375	0.306	-0.285	-0.281
S17	1	4	#NULL!	2.253	2.697	2.497	142.43	73.36	0.369	0.308	-0.276	-0.267
S17	1	5	2.21	#NULL!	2.666	2.633	74.51	144.53	0.337	0.25	-0.27	-0.286
S19	2	1	1.811	1.647	2.448	2.412	76.59	70.32	0.374	0.312	-0.275	-0.232
S19	2	2	2.007	1.597	2.37	2.355	98.17	64.49	0.504	0.401	-0.237	-0.228
S19	2	3	2.01	1.694	2.418	2.466	86.97	77.21	0.399	0.396	-0.242	-0.237
S19	2	4	1.784	1.656	2.526	2.508	76.37	69.64	0.368	0.349	-0.281	-0.249
S19	2	5	1.826	1.643	2.486	2.405	81.03	77.51	0.351	0.353	-0.26	-0.249
S20	2	1	2.792	2.678	2.607	2.326	137.74	157.37	0.437	0.428	-0.311	-0.312
S20	2	2	3.032	2.633	2.634	2.315	146.54	142.72	0.431	0.443	-0.313	-0.284
S20	2	3	2.854	2.545	2.571	2.371	139.49	145.78	0.412	0.506	-0.309	-0.268
S20	2	4	3.029	2.446	2.452	2.436	188.64	128.65	0.432	0.508	-0.306	-0.289
S20	2	5	3.144	2.339	2.704	2.453	222.46	128.26	0.52	0.374	-0.338	-0.352
S21	1	1	1.606	1.549	2.477	2.687	75.52	72.42	0.399	0.497	-0.334	-0.392
S21	1	2	1.755	1.711	2.425	2.495	76.08	88.02	0.426	0.448	-0.307	-0.367
S21	1	3	1.836	1.581	2.43	2.518	79.4	65.57	0.347	0.411	-0.345	-0.352
S21	1	4	1.593	1.603	2.47	2.502	69.94	77.51	0.347	0.439	-0.321	-0.347
S21	1	5	1.57	1.675	2.457	2.497	60.99	68.76	0.327	0.414	-0.328	-0.387
S23	2	1	1.991	1.832	2.243	2.295	107.21	96.53	0.474	0.308	-0.226	-0.245
S23	2	2	1.768	1.714	2.184	2.144	88.26	87.37	0.379	0.404	-0.231	-0.236
S23	2	3	1.784	1.817	2.15	2.201	88.28	94.3	0.382	0.441	-0.212	-0.204
S23	2	4	1.804	1.815	2.23	2.25	92.62	89.98	0.404	0.341	-0.236	-0.223
S23	2	5	1.713	1.64	2.147	2.23	84.23	75.05	0.402	0.37	-0.267	-0.216
S24	1	1	2.088	1.748	2.533	2.509	88.64	71.82	0.306	0.339	-0.255	-0.252
S24	1	2	1.869	1.776	2.348	2.455	78.23	68.59	0.222	0.287	-0.25	-0.268
S24	1	3	2.086	1.75	2.515	2.424	89.34	79.36	0.353	0.359	-0.234	-0.237
S24	1	4	1.926	1.89	2.444	2.669	77.65	69.62	0.317	0.323	-0.215	-0.278
S24	1	5	1.78	1.708	2.505	2.391	71.46	73.68	0.216	0.294	-0.29	-0.268
S25	1	1	#NULL!	1.913	2.699	2.666	121.97	61.78	0.352	0.521	-0.364	-0.293
S25	1	2	2.657	2.062	2.867	2.681	80.86	65.95	0.928	0.389	-0.265	-0.299
S25	1	3	2.664	2.107	2.609	2.505	103.63	60.91	0.73	0.522	-0.238	-0.265
S25	1	4	2.058	2.457	2.571	2.653	71.56	72.49	0.563	0.854	-0.276	-0.275
S25	1	5	2.204	2.252	2.645	2.576	77.94	59.15	0.533	0.911	-0.304	-0.228
S26	1	1	1.919	1.861	2.713	2.695	80.25	76.07	0.433	0.42	-0.351	-0.31
S26	1	2	1.652	1.638	2.578	2.664	71.12	69.42	0.413	0.385	-0.36	-0.38
S26	1	3	1.749	1.699	2.566	2.698	71.82	65.64	0.383	0.388	-0.329	-0.379
S26	1	4	1.76	1.72	2.582	2.696	74.02	73.14	0.387	0.398	-0.336	-0.349
S26	1	5	1.833	1.845	2.596	2.647	79.64	63.24	0.39	0.395	-0.349	-0.359
S27	1	1	1.978	1.596	2.541	2.412	70.66	61.34	0.41	0.31	-0.241	-0.291
S27	1	2	1.722	#NULL!	2.665	2.486	71.22	57.94	0.351	0.268	-0.305	-0.271
S27	1	3	1.799	1.452	2.423	2.454	64.32	50.85	0.433	0.312	-0.227	-0.31
S27	1	4	1.509	1.516	2.489	2.425	53.22	53.63	0.343	0.349	-0.269	-0.261
S27	1	5	1.58	1.574	2.56	2.527	58.97	58.56	0.332	0.337	-0.248	-0.301
S28	2	1	#NULL!	#NULL!	2.383	2.391	89.28	86.37	0.419	0.421	-0.214	-0.27
S28	2	2	#NULL!	#NULL!	2.442	2.412	73.34	79.28	0.393	0.422	-0.244	-0.258
S28	2	3	1.698	1.702	2.396	2.433	65.48	70.87	0.423	0.421	-0.262	-0.267
S28	2	4	#NULL!	1.715	2.378	2.315	73.34	68.38	0.344	0.45	-0.249	-0.214
S28	2	5	1.747	1.667	2.474	2.429	73.1	69	0.423	0.413	-0.29	-0.28
S29	1	1	1.688	#NULL!	2.429	2.489	58.09	57.26	0.301	0.339	-0.297	-0.321
S29	1	2	1.835	1.793	2.512	2.494	58.42	56.44	0.31	0.339	-0.269	-0.292
S29	1	3	1.622	#NULL!	2.51	2.49	52.48	52.61	0.281	0.343	-0.305	-0.338
S29	1	4	1.811	1.665	2.465	2.482	54.64	47.96	0.291	0.328	-0.291	-0.299
S29	1	5	1.533	1.583	2.467	2.45	45.89	50.2	0.288	0.317	-0.316	-0.305
S30	1	1	2.385	#NULL!	3.018	2.847	92.11	99.82	0.277	0.301	-0.292	-0.273
S30	1	2	2.14	#NULL!	2.711	2.807	92.32	108.16	0.278	0.271	-0.239	-0.285
S30	1	3	2.072	#NULL!	2.747	2.884	70	93.91	0.265	0.227	-0.282	-0.334
S30	1	4	2.199	#NULL!	2.865	2.827	80.81	79.3	0.258	0.298	-0.273	-0.273
S30	1	5	2.028	#NULL!	2.882	2.855	68.57	110.68	0.253	0.275	-0.283	-0.262
S31	1	1	1.543	1.733	2.697	2.64	68.37	65.37	0.458	0.421	-0.22	-0.235
S31	1	2	1.701	1.994	2.769	2.664	78.41	62.12	0.412	0.401	-0.252	-0.19
S31	1	3	1.967	1.911	2.729	2.621	85.58	72.19	0.449	0.468	-0.255	-0.206
S31	1	4	2.076	2.072	2.707	2.703	87.35	56.92	0.431	0.432	-0.241	-0.218
S31	1	5	1.819	1.78	2.711	2.626	70.87	69.35	0.33	0.391	-0.295	-0.228
S32	1	1	1.838	1.63	2.512	2.667	73.72	51.62	0.307	0.328	-0.216	-0.247
S32	1	2	1.824	1.796	2.493	2.632	65.88	63.78	0.291	0.348	-0.208	-0.23
S32	1	3	1.705	1.722	2.516	2.687	62.9	62	0.35	0.334	-0.207	-0.256
S32	1	4	1.669	1.581	2.612	2.692	61.88	53.84	0.316	0.331	-0.23	-0.256
S32	1	5	1.6	1.636	2.586	2.634	57.23	54.29	0.321	0.349	-0.2	-0.256
S33	1	1	2.031	1.921	2.343	2.348	69.8	48.37	0.534	0.351	-0.363	-0.349
S33	1	2	2.103	2.099	2.234	2.34	66.83	49.57	0.479	0.453	-0.326	-0.341
S33	1	3	2.078	2.093	2.278	2.441	63.66	50.15	0.502	0.509	-0.318	-0.39
S33	1	4	1.933	1.667	2.327	2.432	64.83	39.85	0.386	0.365	-0.343	-0.45
S33	1	5	1.977	1.937	2.295	2.432	67.04	52.67	0.396	0.381	-0.308	-0.353
S34	2	1	1.86	1.631	2.6	2.471	91.41	76.05	0.316	0.289	-0.271	-0.286
S34	2	2	1.713	1.556	2.492	2.49	78.45	68.75	0.373	0.26	-0.287	-0.31
S34	2	3	1.929	1.736	2.493	2.48	96.95	82.07	0.443	0.293	-0.27	-0.297
S34	2	4	1.712	1.736	2.569	2.428	69.09	87.34	0.361	0.308	-0.286	-0.294
S34	2	5	1.718	1.786	2.425	2.482	72.82	94.38	0.388	0.367	-0.303	-0.254
S35	1	1	1.964	1.682	2.958	2.992	81.99	76.49	0.425	0.442	-0.252	-0.356
S35	1	2	1.704	1.705	2.912	3.077	70.34	84.57	0.364	0.35	-0.314	-0.362
S35	1	3	1.875	1.474	3.011	2.932	76.92	58.71	0.404	0.277	-0.312	-0.395
S35	1	4	1.729	1.457	2.907	2.917	72.72	67.33	0.323	0.35	-0.324	-0.377
S35	1	5	1.842	1.468	2.971	2.947	76.8	70.01	0.324	0.449	-0.339	-0.334
S36	2	1	2.134	2.153	2.352	2.374	85.12	92.06	0.416	0.473	-0.279	-0.322
S36	2	2	2.13	2.058	2.284	2.411	92.14	92.2	0.498	0.4	-0.286	-0.324
S36	2	3	2.144	2.244	2.25	2.351	89.19	91.16	0.481	0.372	-0.214	-0.3
S36	2	4	2.229	1.902	2.311	2.396	110.71	85.01	0.473	0.346	-0.23	-0.309
S36	2	5	2.181	2.217	2.316	2.417	97.76	116.38	0.443	0.406	-0.246	-0.313
S37	2	1	1.84	1.951	2.418	2.38	84.11	76.6	0.357	0.378	-0.321	-0.27
S37	2	2	1.873	1.966	2.514	2.384	52.46	80.74	0.275	0.401	-0.315	-0.279
S37	2	3	1.909	2.055	2.379	2.417	62.77	65.63	0.346	0.32	-0.28	-0.249
S37	2	4	1.876	1.769	2.539	2.502	61.22	44.69	0.297	0.338	-0.316	-0.332
S37	2	5	2.054	1.916	2.467	2.41	78.14	58.7	0.414	0.317	-0.261	-0.261
S38	1	1	1.924	1.756	2.303	2.45	68.02	62.53	0.303	0.296	-0.186	-0.25
S38	1	2	1.872	#NULL!	2.484	2.529	64.1	71.5	0.345	0.254	-0.211	-0.289
S38	1	3	1.778	2.132	2.389	2.381	61.66	70.36	0.292	0.304	-0.227	-0.217
S38	1	4	1.83	2.069	2.578	2.464	63.8	75.27	0.276	0.371	-0.262	-0.201
S38	1	5	2.113	2.178	2.406	2.501	71.68	75.65	0.259	0.319	-0.231	-0.207
S39	1	1	1.821	2.038	2.298	2.383	74.11	80	0.379	0.378	-0.242	-0.253
S39	1	2	1.784	1.902	2.324	2.39	68.26	74.12	0.303	0.337	-0.283	-0.244
S39	1	3	1.573	1.679	2.438	2.46	59.93	61	0.262	0.301	-0.317	-0.298
S39	1	4	1.755	#NULL!	2.423	2.553	66.14	68.73	0.271	0.252	-0.277	-0.322
S39	1	5	1.65	1.369	2.373	2.538	64.49	57.54	0.271	0.287	-0.302	-0.314
S41	2	1	2.494	2.079	2.725	2.598	92.56	65.15	0.519	0.319	-0.209	-0.279
S41	2	2	#NULL!	2.037	2.809	2.66	159.88	71.64	0.318	0.406	-0.332	-0.251
S41	2	3	#NULL!	2.165	2.861	2.863	153.82	76.68	0.386	0.434	-0.29	-0.287
S41	2	4	#NULL!	2.36	2.906	2.726	169.23	79.69	0.421	0.61	-0.245	-0.19
S41	2	5	#NULL!	1.977	2.977	2.809	132.63	79.48	0.447	0.33	-0.225	-0.328
S42	1	1	2	2.521	2.794	2.934	82.1	106.07	0.52	0.476	-0.252	-0.235
S42	1	2	2.577	2.345	2.967	2.736	109.61	104.25	0.537	0.396	-0.214	-0.217
S42	1	3	2.532	2.111	3.003	2.85	117.6	97.22	0.438	0.387	-0.278	-0.228
S42	1	4	2.5	2.494	2.762	3.015	83.89	106.69	0.41	0.46	-0.268	-0.243
S42	1	5	2.722	2.049	2.983	2.756	123.69	93.03	0.468	0.384	-0.249	-0.241
S43	2	1	#NULL!	#NULL!	2.44	2.434	97.93	84.19	0.154	0.269	-0.307	-0.259
S43	2	2	1.504	1.399	2.368	2.354	69.59	57.99	0.208	0.262	-0.295	-0.293
S43	2	3	#NULL!	#NULL!	2.483	2.482	75.51	113.59	0.207	0.284	-0.294	-0.283
S43	2	4	#NULL!	#NULL!	2.421	2.447	74.44	74.89	0.217	0.244	-0.34	-0.286
S43	2	5	#NULL!	#NULL!	2.492	2.445	70.17	82.41	0.271	0.237	-0.331	-0.297
S44	2	1	1.739	2.09	2.444	2.498	67.56	93.21	0.366	0.341	-0.29	-0.248
S44	2	2	1.845	#NULL!	2.468	2.477	73.26	85.03	0.367	0.392	-0.279	-0.253
S44	2	3	1.852	2.052	2.422	2.515	82.41	79.46	0.381	0.428	-0.261	-0.203
S44	2	4	2.022	1.901	2.557	2.439	98.97	77.61	0.379	0.262	-0.267	-0.252
S44	2	5	2.084	2.149	2.535	2.365	87.53	97.66	0.269	0.465	-0.247	-0.184
S45	2	1	1.58	1.435	2.088	2.118	67.89	63.31	0.337	0.329	-0.261	-0.289
S45	2	2	#NULL!	#NULL!	2.137	2.079	63.81	73.15	0.262	0.306	-0.287	-0.261
S45	2	3	1.513	1.497	2.159	2.107	54.62	61.74	0.171	0.32	-0.318	-0.289
S45	2	4	1.338	1.357	2.094	2.125	54.4	54.83	0.18	0.358	-0.304	-0.238
S45	2	5	1.533	1.344	2.089	2.065	59.6	54.88	0.261	0.298	-0.274	-0.255
S46	1	1	1.944	1.911	2.548	2.623	76.57	73.02	0.21	0.372	-0.242	-0.195
S46	1	2	1.731	1.805	2.534	2.534	51.16	64.31	0.212	0.314	-0.244	-0.24
S46	1	3	1.782	1.819	2.514	2.596	53.41	62.05	0.225	0.336	-0.224	-0.241
S46	1	4	1.804	1.753	2.5	2.528	59.25	61.5	0.216	0.325	-0.24	-0.225
S46	1	5	1.719	1.919	2.604	2.561	58.16	72.46	0.249	0.2	-0.23	-0.244
S47	2	1	2.138	2.686	2.959	3.05	74.9	97.79	0.353	0.458	-0.373	-0.31
S47	2	2	2.221	2.076	3.006	2.906	74.97	83.93	0.394	0.416	-0.363	-0.32
S47	2	3	2.235	2.574	3.034	2.951	69.23	98.66	0.427	0.516	-0.354	-0.319
S47	2	4	2.006	2.69	2.981	2.964	66.17	96.67	0.386	0.442	-0.351	-0.32
S47	2	5	2.489	2.453	2.965	2.964	80.38	93.86	0.378	0.439	-0.345	-0.361
S48	1	1	2.413	2.25	2.872	2.928	100	98.76	0.222	0.26	-0.217	-0.265
S48	1	2	2.511	2.344	2.77	2.896	101.78	103.07	0.41	0.315	-0.175	-0.247
S48	1	3	2.561	2.327	2.69	2.91	116.03	111.11	0.52	0.26	-0.228	-0.252
S48	1	4	2.454	2.296	2.797	2.889	94.09	106.72	0.37	0.24	-0.211	-0.282
S48	1	5	2.413	2.334	2.771	3.026	108.52	136.99	0.478	0.229	-0.206	-0.279
S49	2	1	#NULL!	1.999	2.373	2.485	92.3	89.2	0.469	0.541	-0.285	-0.299
S49	2	2	1.96	2.107	2.351	2.279	73.46	89.15	0.531	0.475	-0.266	-0.257
S49	2	3	#NULL!	#NULL!	2.322	2.276	85.29	84.97	0.535	0.369	-0.265	-0.256
S49	2	4	1.96	1.841	2.28	2.45	78.93	79.22	0.514	0.356	-0.276	-0.327
S49	2	5	1.955	1.805	2.296	2.432	75.05	73.15	0.513	0.326	-0.287	-0.326
S50	2	1	2.233	2.047	2.649	2.963	106.52	84.99	0.482	0.422	-0.287	-0.431
S50	2	2	#NULL!	1.887	2.842	2.93	142.21	125.69	0.308	0.4	-0.413	-0.419
S50	2	3	2.145	2.002	2.663	2.921	83.04	111.26	0.375	0.429	-0.316	-0.402
S50	2	4	1.903	1.923	2.759	2.878	75.03	97.95	0.356	0.462	-0.367	-0.413
S50	2	5	1.924	1.791	2.795	2.821	98.24	79.11	0.31	0.371	-0.363	-0.403
S51	2	1	1.526	1.712	2.316	2.319	58.44	72.2	0.303	0.285	-0.25	-0.242
S51	2	2	1.589	1.695	2.164	2.361	63.84	72.35	0.216	0.249	-0.229	-0.27
S51	2	3	1.674	1.625	2.236	2.312	69.32	70.72	0.288	0.261	-0.246	-0.239
S51	2	4	1.763	1.572	2.289	2.414	76.01	64.5	0.217	0.22	-0.269	-0.283
S51	2	5	1.65	1.957	2.361	2.245	71.4	89.6	0.264	0.281	-0.266	-0.219
S52	2	1	2.112	2.405	2.527	2.603	105.65	111.66	0.27	0.445	-0.3	-0.216
S52	2	2	2.389	2.14	2.428	2.475	111.84	106.18	0.583	0.301	-0.144	-0.295
S52	2	3	2.331	2.255	2.582	2.539	122.82	105.02	0.271	0.522	-0.245	-0.261
S52	2	4	2.085	2.037	2.405	2.631	111.28	96.58	0.239	0.307	-0.287	-0.277
S52	2	5	2.171	1.798	2.45	2.475	111.45	89.76	0.311	0.204	-0.237	-0.356
S53	1	1	2.065	2.116	2.693	2.614	66.63	65.04	0.411	0.407	-0.287	-0.238
S53	1	2	2.015	2.16	2.613	2.629	63.17	64.79	0.316	0.576	-0.224	-0.189
S53	1	3	1.91	1.929	2.335	2.55	50.7	56.65	0.358	0.36	-0.181	-0.271
S53	1	4	1.973	2.356	2.442	2.501	57.59	72.78	0.393	0.575	-0.215	-0.217
S53	1	5	1.797	2.17	2.617	2.59	60.55	58.89	0.256	0.448	-0.291	-0.214
S54	2	1	2.25	1.683	2.494	2.272	85.3	72.82	0.318	0.283	-0.324	-0.292
S54	2	2	1.88	2.323	2.435	2.285	73.89	85.25	0.338	0.623	-0.305	-0.279
S54	2	3	1.872	2.017	2.454	2.327	69.94	81.74	0.365	0.455	-0.332	-0.302
S54	2	4	1.841	2.059	2.464	2.334	73.93	76.77	0.374	0.418	-0.334	-0.326
S54	2	5	1.95	2.018	2.437	2.412	94.98	75.19	0.454	0.535	-0.3	-0.3
S55	2	1	1.63	2.158	2.522	2.675	71.4	86.4	0.353	0.443	-0.267	-0.243
S55	2	2	1.867	1.686	2.483	2.568	73.61	79.68	0.329	0.401	-0.266	-0.258
S55	2	3	1.714	2.287	2.436	2.664	87.53	89.35	0.364	0.478	-0.264	-0.218
S55	2	4	2.186	1.831	2.529	2.524	88.97	80.41	0.299	0.321	-0.264	-0.294
S55	2	5	1.737	1.986	2.53	2.573	76.99	90.77	0.411	0.447	-0.268	-0.256
S56	1	1	1.987	1.719	2.877	2.584	67.1	67.98	0.476	0.456	-0.273	-0.251
S56	1	2	1.886	1.801	2.669	2.701	75.77	69.47	0.391	0.389	-0.274	-0.289
S56	1	3	2.073	1.802	2.714	2.671	78.47	72.29	0.447	0.393	-0.248	-0.258
S56	1	4	1.791	1.726	2.719	2.608	72.29	67.61	0.529	0.373	-0.291	-0.275
S56	1	5	1.797	1.828	2.628	2.698	69.72	75.27	0.385	0.327	-0.279	-0.262
S57	2	1	1.89	1.866	2.291	2.416	79.82	91.63	0.302	0.333	-0.214	-0.287
S57	2	2	1.895	1.772	2.432	2.436	81.18	89.45	0.231	0.381	-0.276	-0.268
S57	2	3	1.858	1.846	2.493	2.432	77.46	83.33	0.252	0.337	-0.302	-0.261
S57	2	4	1.774	2.052	2.275	2.321	70.48	116.91	0.265	0.448	-0.293	-0.228
S57	2	5	1.85	1.732	2.406	2.405	75.97	94.28	0.337	0.262	-0.239	-0.311
S58	2	1	#NULL!	2.182	2.433	2.364	88.78	77.89	0.36	0.351	-0.299	-0.256
S58	2	2	1.681	2.121	2.39	2.261	79.18	68.43	0.367	0.346	-0.257	-0.252
S58	2	3	1.675	1.851	2.415	2.322	76.5	60.96	0.467	0.324	-0.247	-0.302
S58	2	4	1.9	1.964	2.397	2.414	81.63	47.65	0.384	0.402	-0.27	-0.24
S58	2	5	1.464	#NULL!	2.401	2.381	65.07	84.15	0.347	0.356	-0.29	-0.279
S59	2	1	1.833	#NULL!	2.688	#NULL!	95.6	#NULL!	0.468	#NULL!	-0.39	#NULL!
S59	2	2	2.269	#NULL!	2.727	#NULL!	133.65	#NULL!	0.538	#NULL!	-0.365	#NULL!
S59	2	3	2.18	#NULL!	2.748	#NULL!	104.62	#NULL!	0.48	#NULL!	-0.401	#NULL!
S59	2	4	2.267	1.957	2.818	2.585	121.66	119.99	0.58	0.502	-0.335	-0.341
S59	2	5	2.457	1.935	2.656	2.661	128.65	97.84	0.481	0.477	-0.334	-0.376
S60	2	1	#NULL!	#NULL!	2.405	2.189	91.44	77.64	0.399	0.355	-0.235	-0.218
S60	2	2	#NULL!	#NULL!	2.421	2.332	86.73	67.62	0.357	0.323	-0.267	-0.28
S60	2	3	#NULL!	#NULL!	2.451	2.414	89.61	76.72	0.303	0.274	-0.273	-0.275
S60	2	4	#NULL!	#NULL!	2.327	2.315	82.07	79.87	0.368	0.299	-0.255	-0.268
S60	2	5	1.765	1.815	2.246	2.206	67.81	71.99	0.35	0.364	-0.259	-0.235
